# Supplementary material for: Self-reduction and morphology control of gold nanoparticles by dendronized poly(amido amine)s for photothermal therapy
Source: Royal Society of Chemistry journal article supplement (doi:10.1039/c4ra08475f), 2014-09-12
Supplement: c4ra08475f1.pdf [file c4ra08475f1.pdf]

**Electronic Supplementary Information for:**

**Self-reduction and morphology control of gold nanoparticles by  
dendronized poly(amido amine)s for photothermal therapy**

Ping Dong, Jianyu Xin, Xiao Yang, Jin Jia, Wei Wu and Jianshu Li\*

*College of Polymer Science and Engineering, Sichuan University, Chengdu, 610065, China*

*E-mail address: [jianshu\\_li@scu.edu.cn](mailto:jianshu_li@scu.edu.cn) (J. Li)*

*Tel.: +86 28 85466755.*

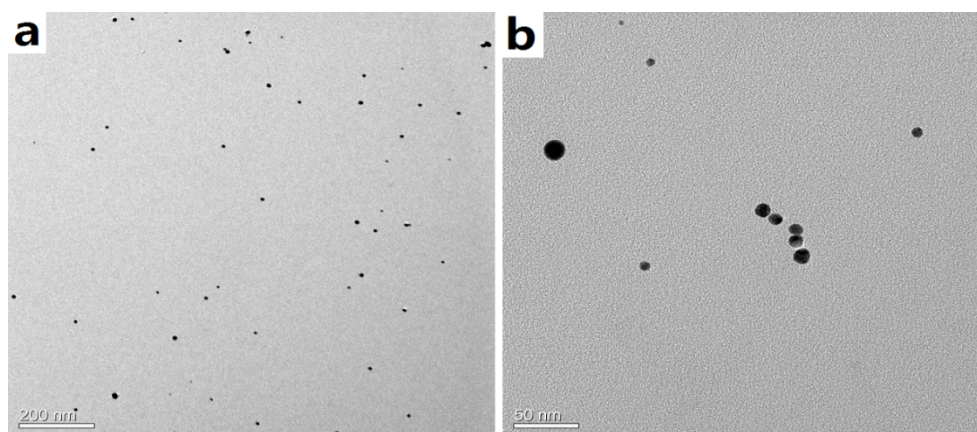

**Figure S1.** TEM images of gold nanoparticles:  $[\text{HAuCl}_4] = 0.5 \text{ mM}$ ,  $T = 70^\circ\text{C}$ ,  $\text{pH} = 6.5$ .

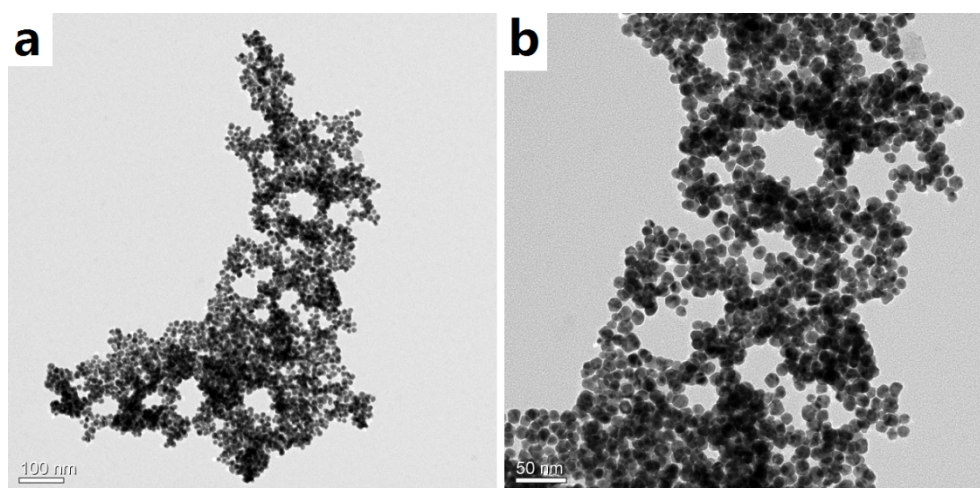

**Figure S2.** TEM images of gold nanoparticles:  $[\text{HAuCl}_4] = 1.5 \text{ mM}$ ,  $T = 70^\circ\text{C}$ ,  $\text{pH} = 6.5$ .

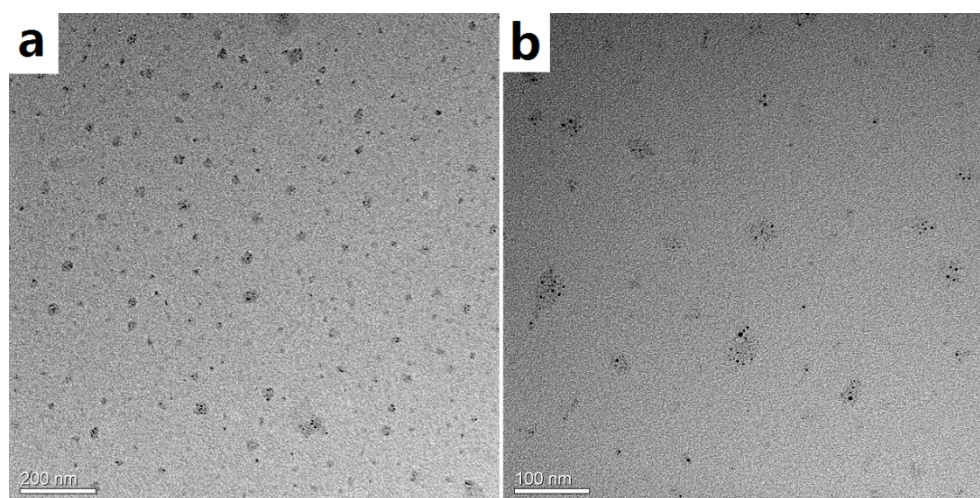

**Figure S3.** TEM images of gold nanoparticles:  $[\text{HAuCl}_4] = 2.0 \text{ mM}$ ,  $T = 70^\circ\text{C}$ ,  $\text{pH} = 6.5$ .
